# Supplementary material
Source: PubMed Central journal article supplement (PMC3908771)
Supplement: NIHMS548404-supplement-1_si_001.pdf [file NIHMS548404-supplement-1_si_001.pdf]

# Supporting Information

## Native Top-Down ESI-MS Study of 158 kDa Protein Complex by High Resolution Fourier Transform Ion Cyclotron Resonance Mass Spectrometry

Huilin Li,<sup>†</sup> Jeremy J. Wolff,<sup>‡</sup> Steve L. Van Orden,<sup>‡</sup> and Joseph A. Loo<sup>†#\*</sup>

<sup>†</sup>Department of Biological Chemistry, David Geffen School of Medicine, and <sup>#</sup>Department of Chemistry and Biochemistry, University of California, Los Angeles, CA, 90095, USA

<sup>‡</sup>Bruker Daltonics, 40 Manning Road, Billerica, MA, 01821, USA

## EXPERIMENTAL METHODS

**Materials.** Aldolase from rabbit muscle and ammonium acetate were purchased from Sigma-Aldrich (St. Louis, MO). Acetonitrile and formic acid were obtained from Fisher Scientific (Pittsburgh, PA).

**Sample Preparation.** Aldolase was dissolved in MilliQ water to a concentration of 100  $\mu\text{M}$  and then buffer exchanged three times with 200 mM ammonium acetate solution (300  $\mu\text{L}$  each time) using Amicon centrifugal filters (Millipore Inc., Billerica, MA) with a molecular weight cut-off (MWCO) of 50 K. The buffer exchanged protein sample was then diluted with 200 mM ammonium acetate solution to a concentration of 20  $\mu\text{M}$  for native nano-ESI-MS analysis.

**FT-ICR MS Analysis.** Protein solutions were loaded into metal-coated borosilicate capillaries (Au/Pd-coated, 1  $\mu\text{m}$  I.D.; Thermo Fisher Scientific, West Palm Beach, FL) and sprayed at a flow rate of 10 - 40 nL/min through a nanospray ion source. High resolution measurements for the native protein solutions were acquired using a 12 T Bruker solariX<sup>TM</sup> XR FT-ICR MS (Bruker Daltonics, Bremen, Germany) with the ParaCell.<sup>16, 20</sup> Other experiments were performed using a 15 T Bruker solariX FT-ICR MS with an infinity cell. The ESI capillary voltage was set to 0.9~1.2 kV. The temperature of the drying gas was 80 °C and the flow rate was 2.5 L/min. The RF amplitude of the ion-funnels was 300

$V_{pp}$ , and the applied voltages were 200 V and 6 V for funnels 1 and 2, respectively. The voltage of skimmer 1 was varied up to 150 V to pre-heat ions but without inducing ion fragmentation and the skimmer 2 voltage was maintained at 20 V. The lowest values of RF frequencies were used in all ion-transmission regions: multipole 1 (2 MHz), quadrupole (1.4 MHz), and transfer hexpole (1MHz). Ions were accumulated for 500 ms in the hexapole collision cell before being transmitted to the ICR cell. The time-of-flight of 2.5 ms was used. Vacuum pressures for different regions of the 15 T system were  $\sim 2.3$  mbar for the source region,  $\sim 2.4 \times 10^{-6}$  mbar for the quadrupole region, and  $\sim 2.6 \times 10^{-9}$  mbar for the UHV-chamber pressure. The UHV pressure for the 12T system with the new cell is ca.  $6 \times 10^{-10}$  mbar. ECD experiments were performed with an ECD pulse length of 0.01–0.02 s, ECD bias of 1.5 V, and ECD lens of 15 V. The ECD hollow-cathode current was 1.6 A. Up to 300 scans were averaged for each spectrum and all spectra were externally calibrated with cesium iodide. Data was processed in DataAnalysis and interpreted manually.

**Table S-1.** The isotopic mass-list table of the 26+ non-adducted tetrameric aldolase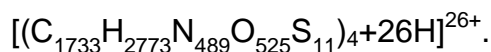

| #  | Magnitude Mode   |                 |                 |                  | Absorption Mode |                 |                  |
|----|------------------|-----------------|-----------------|------------------|-----------------|-----------------|------------------|
|    | Theo. <i>m/z</i> | Exp. <i>m/z</i> | Resolving Power | Mass Error (ppm) | Exp. <i>m/z</i> | Resolving Power | Mass Error (ppm) |
| 1  | 6032.20209       | 6032.20018      | 422632          | -0.32            | 6032.20224      | 1006237         | 0.02             |
| 2  | 6032.24065       | 6032.24049      | 342045          | -0.03            | 6032.24202      | 592319          | 0.23             |
| 3  | 6032.27921       | 6032.27686      | 183779          | -0.39            | 6032.28029      | 682948          | 0.18             |
| 4  | 6032.31776       | 6032.31357      | 255115          | -0.69            | 6032.31759      | 557074          | 0                |
| 5  | 6032.35632       | 6032.35443      | 520656          | -0.31            | 6032.35679      | 726866          | 0.08             |
| 6  | 6032.39488       | 6032.39531      | 604127          | 0.07             | 6032.39697      | 874429          | 0.35             |
| 7  | 6032.43344       | 6032.43548      | 276851          | 0.34             | 6032.43686      | 897715          | 0.57             |
| 8  | 6032.47199       | 6032.46537      | 344641          | -1.1             | 6032.47378      | 452396          | 0.30             |
| 9  | 6032.51055       | 6032.50785      | 487330          | -0.45            | 6032.51111      | 459409          | 0.09             |
| 10 | 6032.54911       | 6032.55164      | 518302          | 0.42             | 6032.55311      | 504063          | 0.66             |
| 11 | 6032.58766       | 6032.58611      | 172729          | -0.26            | 6032.58785      | 285087          | 0.03             |
| 12 | 6032.62622       | 6032.62159      | 336353          | -0.77            | 6032.62752      | 486055          | 0.22             |
| 13 | 6032.66478       | 6032.66618      | 441620          | 0.23             | 6032.66694      | 775977          | 0.36             |
| 14 | 6032.70333       | 6032.69814      | 547722          | -0.86            | 6032.69991      | 353134          | -0.60            |
| 15 | 6032.74189       | 6032.74321      | 648864          | 0.22             | 6032.74508      | 918383          | 0.53             |
| 16 | 6032.78045       | 6032.77891      | 367031          | -0.26            | 6032.78130      | 733458          | 0.14             |
| 17 | 6032.81900       | 6032.81653      | 748585          | -0.41            | 6032.82112      | 551656          | 0.37             |
| 18 | 6032.85756       | 6032.85824      | 275587          | 0.11             | 6032.85978      | 623611          | 0.37             |
| 19 | 6032.89611       | 6032.89265      | 582885          | -0.57            | 6032.89550      | 466279          | -0.10            |
| 20 | 6032.93467       | 6032.92919      | 441325          | -0.91            | 6032.93180      | 709151          | -0.50            |
| 21 | 6032.97322       | 6032.9663       | 212980          | -1.15            | 6032.97647      | 433793          | 0.54             |
| 22 | 6033.01178       | 6033.01297      | 502877          | 0.20             | 6033.01396      | 988277          | 0.36             |
| 23 | 6033.05033       | 6033.0494       | 538993          | -0.15            | 6033.05237      | 668649          | 0.34             |
| 24 | 6033.08889       | 6033.08944      | 847021          | 0.09             | 6033.09008      | 953087          | 0.20             |
| 25 | 6033.12744       | 6033.12821      | 524429          | 0.13             | 6033.12920      | 664118          | 0.29             |
| 26 | 6033.16600       | 6033.16738      | 617729          | 0.23             | 6033.16854      | 690630          | 0.42             |
| 27 | 6033.20455       | 6033.20564      | 435898          | 0.18             | 6033.20734      | 458836          | 0.46             |
| 28 | 6033.24311       | 6033.24647      | 565043          | 0.56             | 6033.24580      | 775095          | 0.45             |
| 29 | 6033.28166       | 6033.28416      | 611173          | 0.41             | 6033.28382      | 588346          | 0.36             |
| 30 | 6033.32022       | 6033.32246      | 693065          | 0.37             | 6033.32215      | 707593          | 0.32             |
| 31 | 6033.35877       | 6033.35991      | 1041911         | 0.19             | 6033.36062      | 740219          | 0.31             |
| 32 | 6033.39733       | 6033.39915      | 354978          | 0.30             | 6033.39243      | 915614          | -0.80            |
| 33 | 6033.43588       | 6033.43859      | 471404          | 0.45             | 6033.43883      | 588854          | 0.49             |
| 34 | 6033.47443       | 6033.47787      | 383642          | 0.57             | 6033.47777      | 652330          | 0.55             |
| 35 | 6033.51299       | 6033.51406      | 795011          | 0.18             | 6033.51614      | 559541          | 0.52             |
| 36 | 6033.55154       | 6033.55282      | 819098          | 0.21             | 6033.55252      | 551361          | 0.16             |

|                                         |            |            |        |       |            |         |       |
|-----------------------------------------|------------|------------|--------|-------|------------|---------|-------|
| 37                                      | 6033.59009 | 6033.59124 | 515945 | 0.19  | 6033.59216 | 820060  | 0.34  |
| 38                                      | 6033.62865 | 6033.63077 | 545586 | 0.35  | 6033.63130 | 686454  | 0.44  |
| 39                                      | 6033.66720 | 6033.66829 | 515220 | 0.18  | 6033.66854 | 762847  | 0.22  |
| 40                                      | 6033.70575 | 6033.70772 | 515220 | 0.33  | 6033.70768 | 718291  | 0.32  |
| 41                                      | 6033.74431 | 6033.74520 | 764790 | 0.15  | 6033.74513 | 762127  | 0.14  |
| 42                                      | 6033.78286 | 6033.78509 | 764790 | 0.37  | 6033.78573 | 925006  | 0.48  |
| 43                                      | 6033.82141 | 6033.82300 | 568715 | 0.26  | 6033.82372 | 646045  | 0.38  |
| 44                                      | 6033.85997 | 6033.86075 | 530478 | 0.13  | 6033.86118 | 689966  | 0.20  |
| 45                                      | 6033.89852 | 6033.89344 | 547332 | -0.84 | 6033.90097 | 472419  | 0.41  |
| 46                                      | 6033.93707 | 6033.93678 | 286519 | -0.05 | 6033.93763 | 435541  | 0.21  |
| 47                                      | 6033.97562 | 6033.97601 | 669950 | 0.06  | 6033.97633 | 709382  | 0.12  |
| 48                                      | 6034.01418 | 6034.01656 | 511694 | 0.39  | 6034.01610 | 766613  | 0.32  |
| 49                                      | 6034.05273 | 6034.04895 | 502153 | -0.63 | 6034.05265 | 571571  | 0     |
| 50                                      | 6034.09128 | 6034.09369 | 352219 | 0.40  | 6034.09300 | 526283  | 0.29  |
| 51                                      | 6034.12983 | 6034.13138 | 416532 | 0.26  | 6034.13041 | 695412  | 0.10  |
| 52                                      | 6034.16838 | 6034.16703 | 397551 | -0.22 | 6034.16856 | 666724  | 0.03  |
| 53                                      | 6034.20694 | 6034.20399 | 398683 | -0.49 | 6034.20580 | 535109  | -0.20 |
| 54                                      | 6034.24549 | 6034.24539 | 960978 | -0.02 | 6034.24597 | 1068154 | 0.08  |
| 55                                      | 6034.28404 | 6034.28443 | 593822 | 0.06  | 6034.28426 | 774756  | 0.04  |
| 56                                      | 6034.32259 | 6034.32403 | 822748 | 0.24  | 6034.32114 | 627279  | -0.20 |
| 57                                      | 6034.36114 | 6034.36229 | 398006 | 0.19  | 6034.36157 | 730919  | 0.07  |
| 58                                      | 6034.39969 | 6034.40100 | 465158 | 0.22  | 6034.39851 | 749229  | -0.20 |
| 59                                      | 6034.43825 | 6034.43647 | 522493 | -0.29 | 6034.43738 | 711194  | -0.10 |
| 60                                      | 6034.47680 | 6034.46353 | 760253 | -2.20 | 6034.47628 | 756098  | -0.10 |
| 61                                      | 6034.51535 | 6034.51440 | 745469 | -0.16 | 6034.51488 | 895533  | -0.10 |
| 62                                      | 6034.55390 | 6034.55324 | 589437 | -0.11 | 6034.55330 | 901327  | -0.10 |
| 63                                      | 6034.59245 | 6034.59110 | 389482 | -0.22 | 6034.59132 | 832195  | -0.20 |
| 64                                      | 6034.63100 | 6034.62731 | 597304 | -0.61 | 6034.62858 | 532470  | -0.40 |
| 65                                      | 6034.66955 | 6034.66891 | 432092 | -0.11 | 6034.66912 | 767342  | -0.10 |
| 66                                      | 6034.70810 | 6034.70437 | 500808 | -0.62 | 6034.70626 | 588842  | -0.30 |
| 67                                      | 6034.74665 | 6034.74364 | 477116 | -0.50 | 6034.74480 | 660063  | -0.30 |
| 68                                      | 6034.78520 | 6034.78351 | 462863 | -0.28 | 6034.78409 | 665255  | -0.20 |
| 69                                      | 6034.82375 | 6034.82443 | 420344 | 0.113 | 6034.82261 | 662213  | -0.20 |
| 70                                      | 6034.86230 | 6034.86042 | 920482 | -0.31 | 6034.86170 | 627844  | -0.10 |
| 71                                      | 6034.90085 | 6034.90035 | 542899 | -0.08 | 6034.90003 | 846868  | -0.10 |
| 72                                      | 6034.9394  | 6034.93747 | 527620 | -0.32 | 6034.93703 | 747905  | -0.40 |
| 73                                      | 6034.97795 | 6034.97520 | 524641 | -0.46 | 6034.97553 | 636822  | -0.40 |
| <b>Average Resolving Power</b>          |            |            | 525902 |       |            | 681709  |       |
| <b>Average Absolute Deviation (ppm)</b> |            |            |        | 0.36  |            | 0.28    |       |

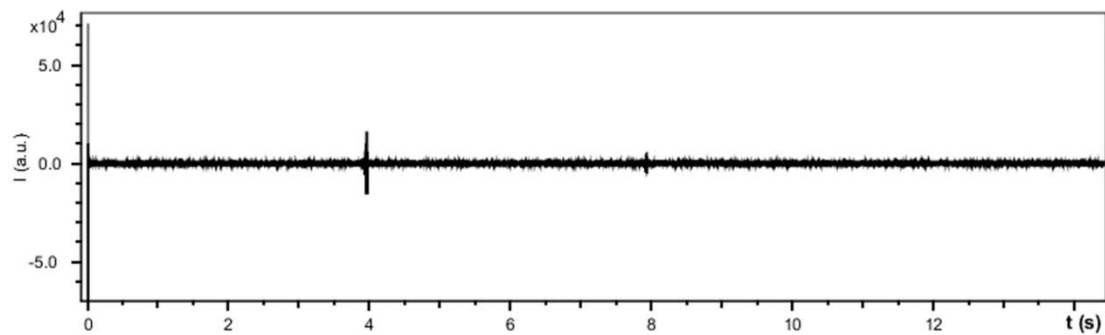

**Figure S-1.** Transient obtained using a 15 T FT-ICR MS with an infinity cell for the 27+ charged ions at  $m/z$   $5082 \pm 50$  Da.

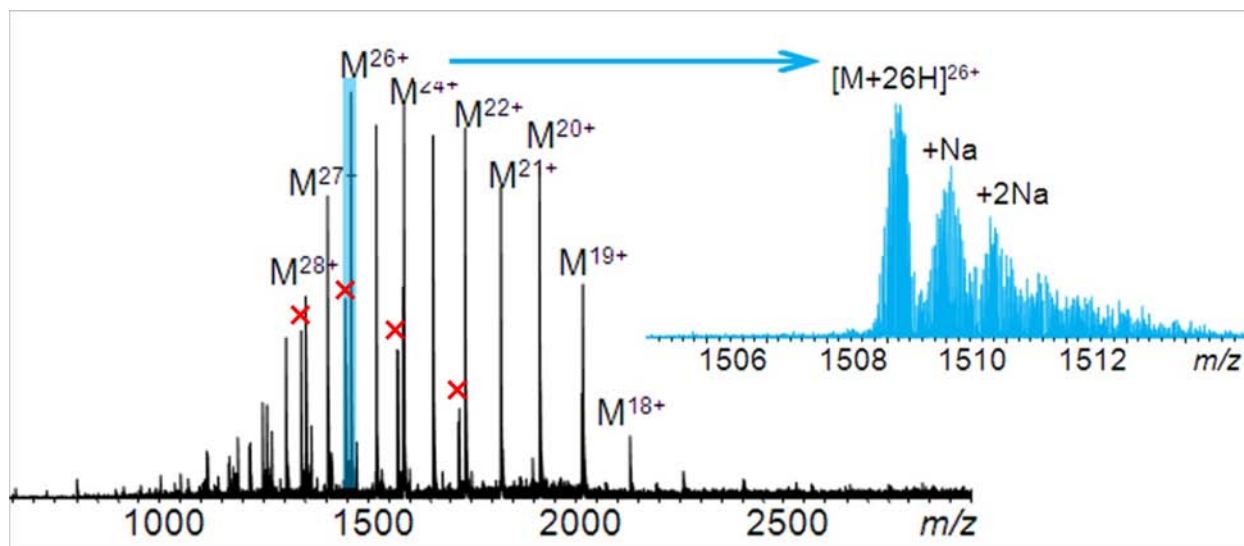

**Figure S-2.** Full mass spectrum of denatured aldolase monomer. The MS region of 26+ charge state is expanded and shown in the inset. Note: The second group of species with the label of "x" is the hydrolysis product of aldolase monomer.

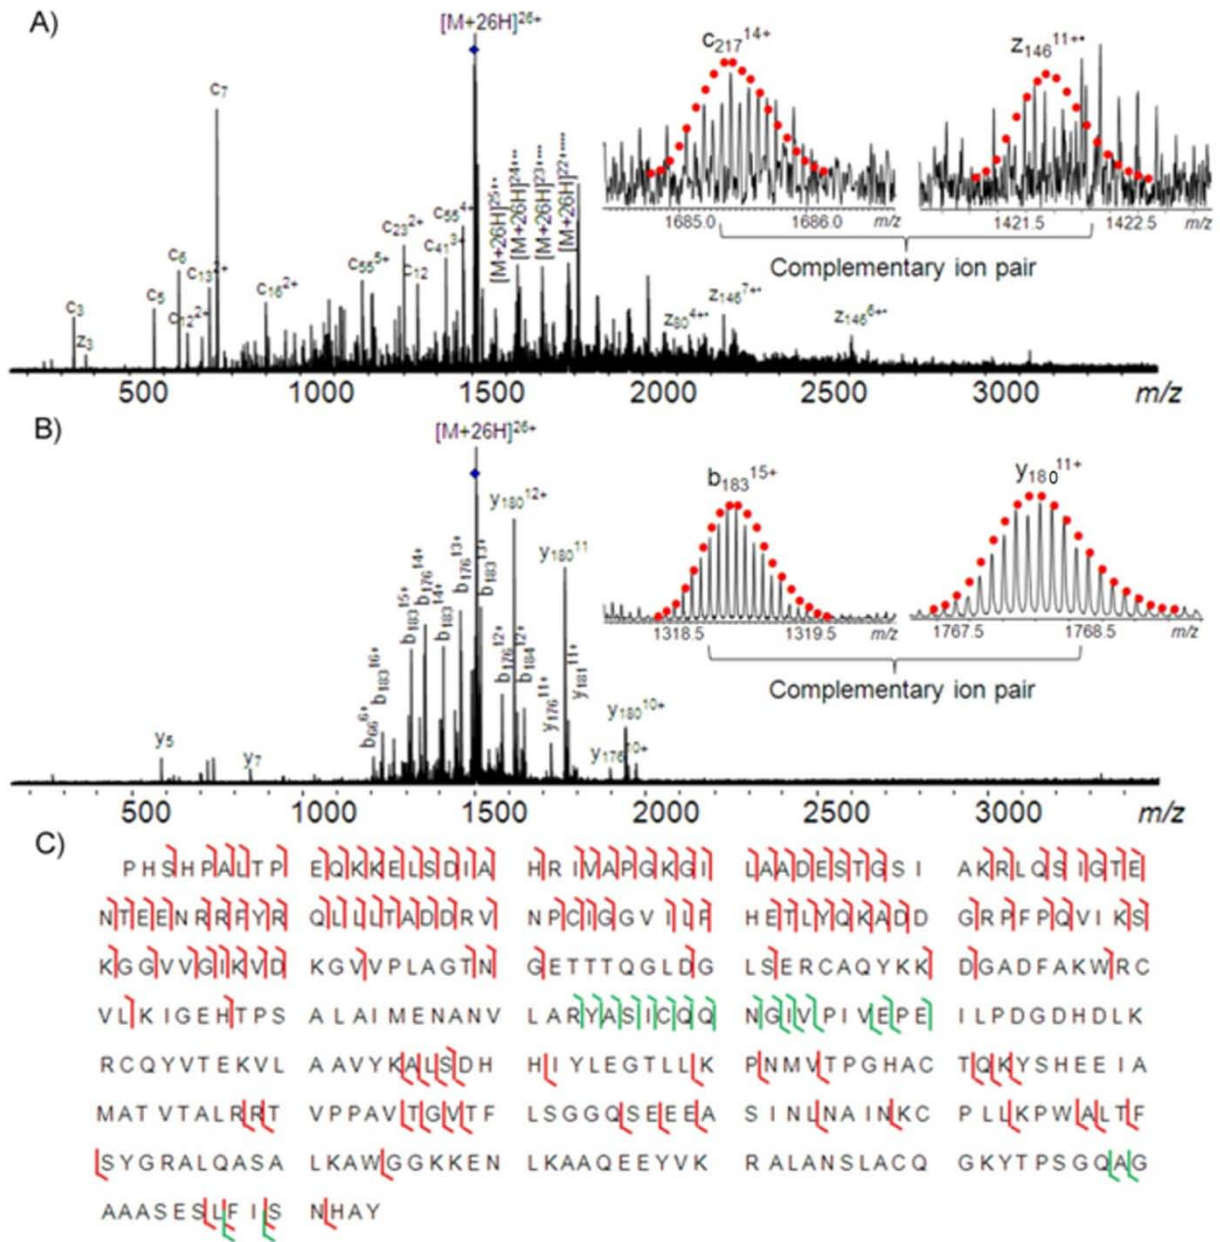

**Figure S-3.** A) Top-down ECD of denatured aldolase monomer (26+), (B) top-down CAD of the denatured aldolase monomer (26+), and (C) backbone cleavage sites (b/y fragments are in green and c/z• fragments are in red).



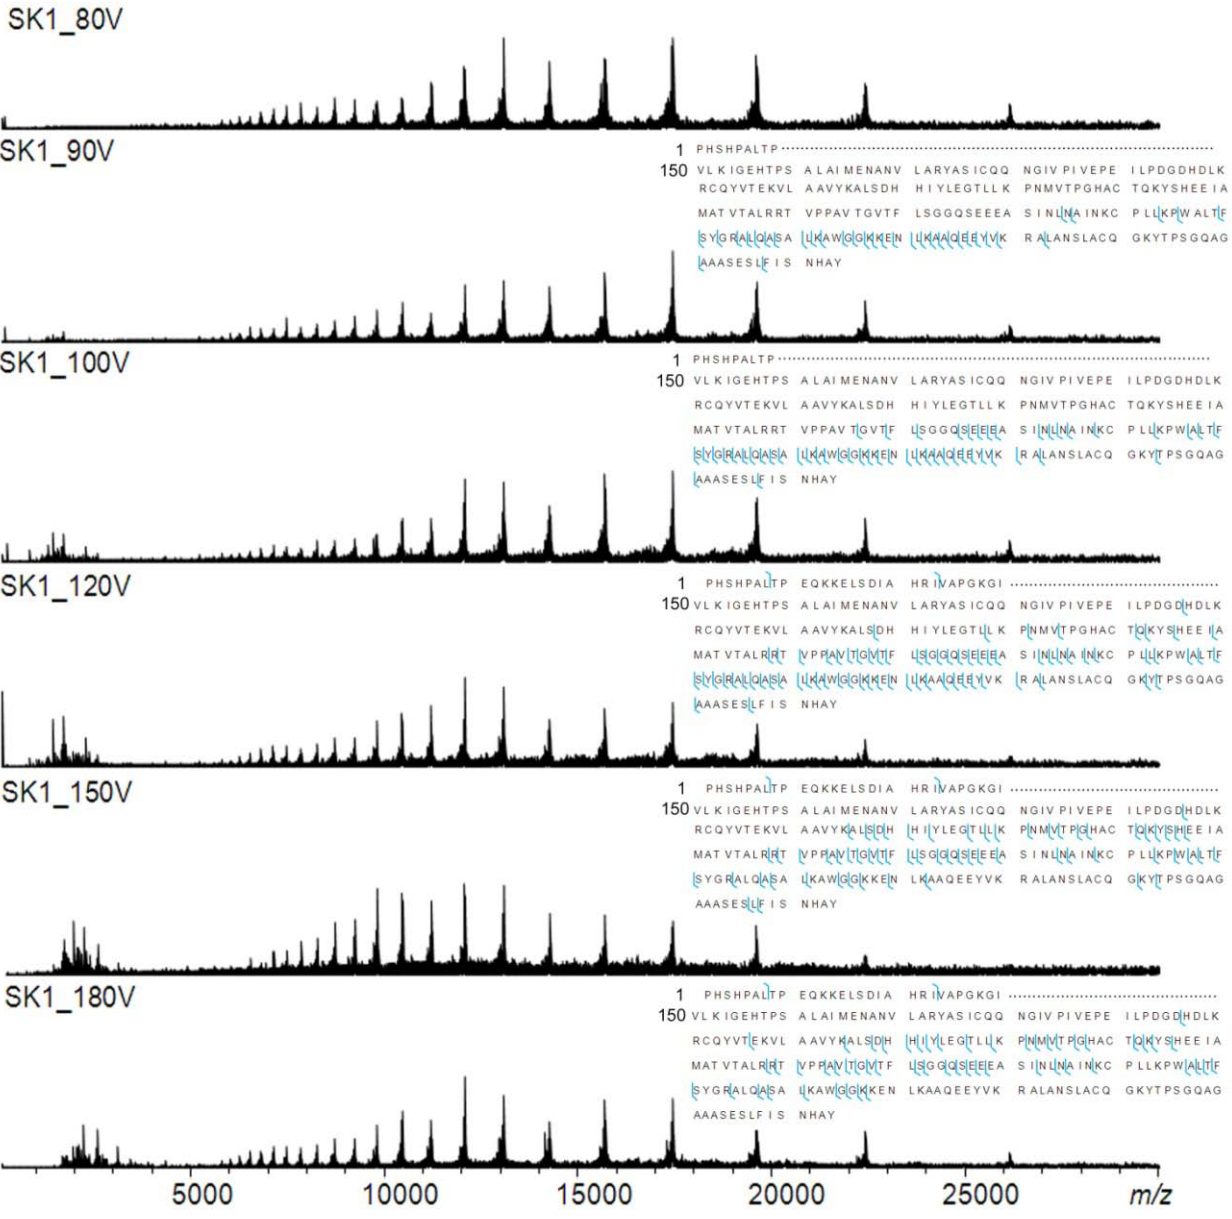

**Figure S-4.** Native top-down ECD of aldolase tetramer with various skimmer potentials for pre-activation.

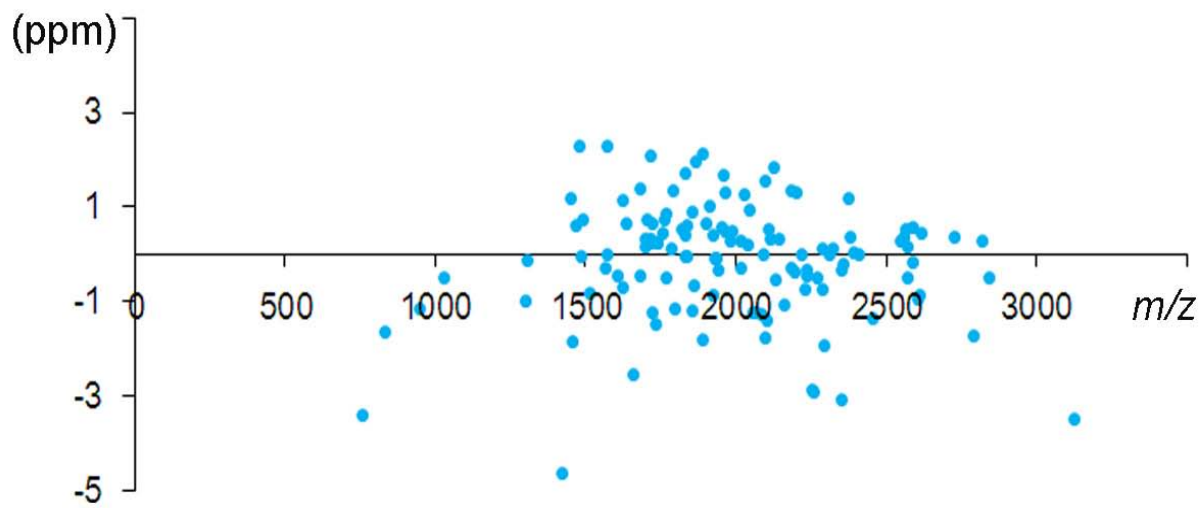

**Figure S-5.** Mass accuracy of product ions from native top-down ECD of aldolase tetramer.

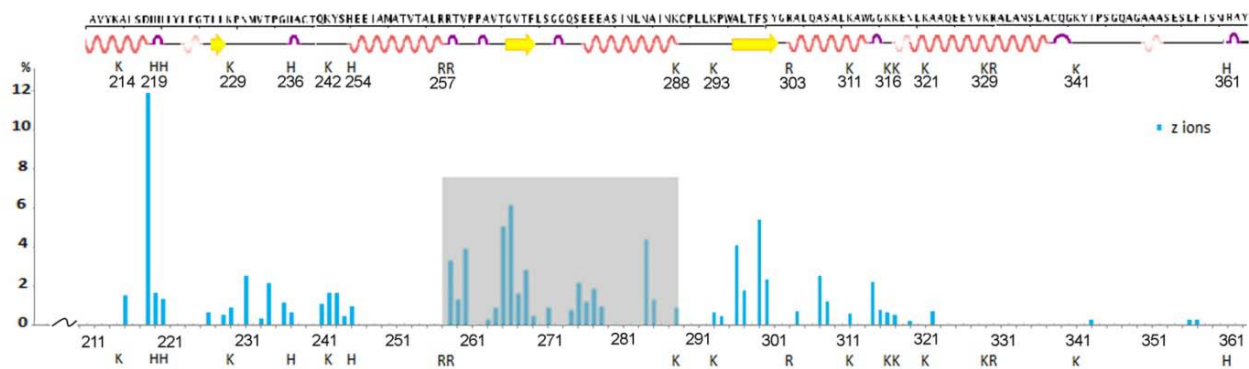

**Figure S-4.** Normalized abundance of  $z^+$ -fragment ions from native top-down ECD of the aldolase tetramer. The top of the Figure shows the secondary structure and sequence of aldolase. The potential positive charge carrier sites (R, K, H) are indicated.
